# Supplementary material
Source: publisher figshare collection journal article supplement (https://acs.figshare.com/ndownloader/files/15611483)

## Supporting information

### **Tandem mass spectrometry imaging reveals distinct accumulation patterns of steroid structural isomers in human adrenal glands**

Emi Takeo<sup>†</sup>, Yuki Sugiura<sup>‡</sup>, Tatsuki Uemura<sup>§</sup>, Koshiro Nishimoto<sup>‡,†</sup>, Masanori Yasuda<sup>‡</sup>, Eiji Sugiyama<sup>‡</sup>, Sumio Ohtsuki<sup>§</sup>, Tatsuya Higashi<sup>#</sup>, Tetsuo Nishikawa<sup>¶</sup>, Makoto Suematsu<sup>‡</sup>, Eiichiro Fukusaki<sup>†</sup>, Shuichi Shimma<sup>†\*</sup>

<sup>†</sup>Department of Biotechnology, Graduate School of Engineering, Osaka University, 2-1 Yamadaoka, Suita, Osaka 565-0871, Japan

<sup>‡</sup>Department of Biochemistry, Keio University School of Medicine, 35 Shinanomachi, Shinjuku-ku, Tokyo 160-8582, Japan

<sup>§</sup>Department of Pharmaceutical Microbiology, Faculty of Life Sciences, Kumamoto University, 5-1 Oe-honmachi, Chuo-ku, Kumamoto 862-0973, Japan

<sup>¶</sup>Department of Uro-Oncology, Saitama Medical University International Medical Center, 1397-1 Yamane, Hidaka, Saitama 350-1298, Japan

<sup>‡</sup>Department of Pathology, Saitama Medical University International Medical Center, 1397-1 Yamane, Hidaka, Saitama 350-1298, Japan

<sup>#</sup>Faculty of Pharmaceutical Sciences, Tokyo University of Science, 2641 Yamazaki, Noda, Chiba 278-8510, Japan

<sup>†</sup>Endocrinology and Diabetes Center, Yokohama Rosai Hospital, 3211 Kozukuecho, Kohoku-ku, Yokohama, Kanagawa 222-0036, Japan

## **Abstract**

Visualizing tissue distribution of steroid hormones is a promising application of MALDI mass spectrometry imaging (MSI). On-tissue chemical derivatization using Girard T reagent has enhanced the ionization efficiency of steroids. However, discriminating between structural isomers with distinct bioactivities remains a challenge. Herein, we used ion trap MS/tandem MS (MS<sup>3</sup>) to distinguish a mineral corticoid aldosterone (Aldo) and a glucocorticoid cortisol (F), from their structural isomers. Our method is also useful to detect hybrid steroids (18-hydroxycortisol [18-OHF] and 18-oxocortisol) with sufficient signal-to-noise ratio. The clinical applicability of the tandem MS method was evaluated by analyzing F, Aldo, and 18-OHF distributions in human adrenal glands. In such clinical specimens, small Aldo-producing cell clusters (APCCs) were identified and were first found to produce a high level of Aldo and not to contain F. Moreover, a part of APCCs produced 18-OHF, presumably converted from F by APCC-specific CYP11B2 activity. Catecholamine species were also visualized with another derivatization reagent

(TAHS), and those profiling successfully discriminated pheochromocytoma species.

These tandem MSI-methods, coupled with on-tissue chemical derivatization has proven to be useful for detecting low-abundance steroids, including Aldo and hybrid steroids and thus identifying steroid hormone-producing lesions.

### **Content of SI materials**

**Figure S1.** Human adrenocortical steroidogenesis pathways.

**Figure S2.** Comparison of matrix application methods for determination of MS<sup>3</sup> peak intensity of Aldo.

**Figure S1. Human adrenocortical steroidogenesis pathways.** Four pairs of structural isomers exist in the pathway. 18-OH-Corticosterone (blue) is a structural isomer of cortisol (red) and cortisone (blue) is a structural isomer of aldosterone (red).

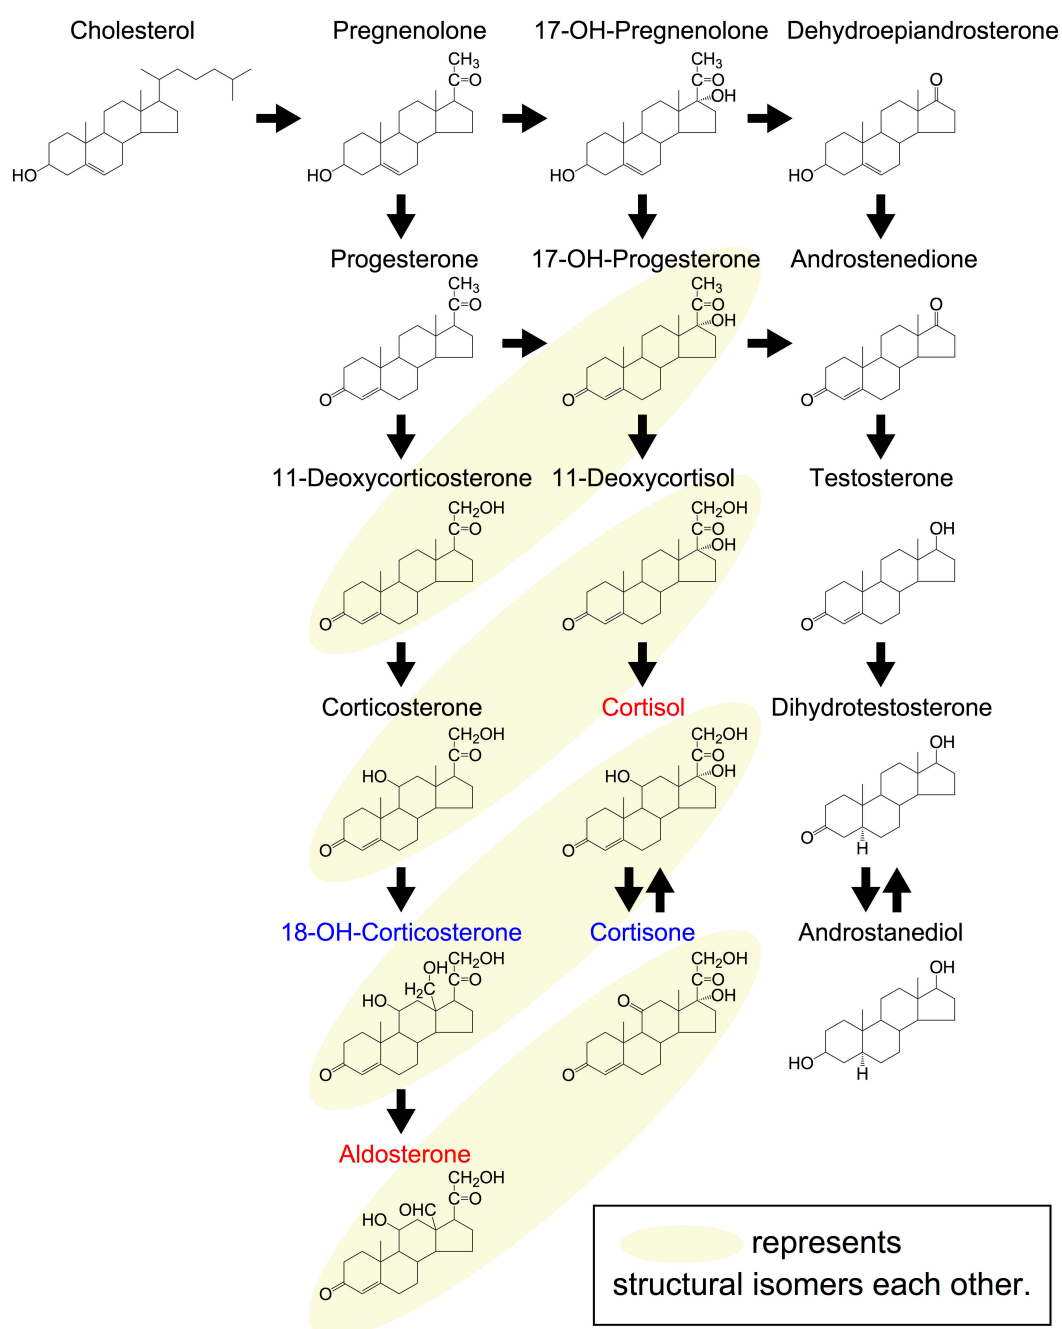



**Figure S2. Comparison of matrix application methods for determination of MS<sup>3</sup> peak intensity of Aldo.** The  $\alpha$ -CHCA two-step method provided a clear view of GirT-Aldo distribution in the ZG.

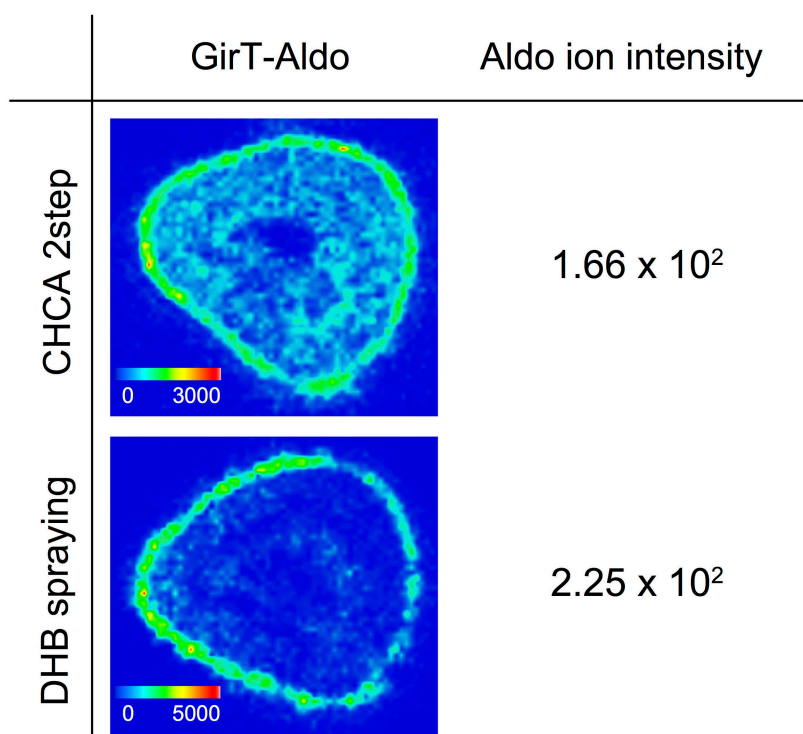

Supplement: Supplementary file 1 [file 15611483]
